# Supplementary material for: Superior catalytic performance of a CoOx/Sn–CeO2 hybrid material for catalytic diesel soot oxidation
Source: Royal Society of Chemistry journal article supplement (doi:10.1039/c8nj01184b), 2018-01-01
Supplement: c8nj01184b1.pdf [file c8nj01184b1.pdf]

## Electronic Supplementary Information

### Superior catalytic performance of $\text{CoO}_x/\text{Sn-CeO}_2$ hybrid material for catalytic diesel soot oxidation

Deboshree Mukherjee,<sup>ab</sup> Damma Devaiah,<sup>c</sup> Perala Venkataswamy,<sup>d</sup> T. Vinodkumar,<sup>e</sup> Panagiotis G. Smirniotis,<sup>c</sup> Benjaram M. Reddy<sup>\*a</sup>

<sup>a</sup> *Inorganic and Physical Chemistry Division, CSIR – Indian Institute of Chemical Technology, Uppal Road, Hyderabad – 500 007, India*

<sup>b</sup> *Academy of Scientific and Innovative Research, CSIR – Indian Institute of Chemical Technology, Uppal Road, Hyderabad – 500 007, India*

<sup>c</sup> *Chemical Engineering Program, Biomedical, Chemical, and Environmental Engineering, University of Cincinnati, Cincinnati, OH 45221-0012, USA*

<sup>d</sup> *Department of Chemistry, Osmania University, Hyderabad – 500 007, India*

<sup>e</sup> *Department of Chemistry, Indian Institute of Technology, Hyderabad – 502 285, India*

\*Corresponding author: Benjaram M. Reddy

E-mail: [bmreddy@iict.res.in](mailto:bmreddy@iict.res.in), [mreddyb@yahoo.com](mailto:mreddyb@yahoo.com)

Phone: +91 40 2719 1714, Fax: +91 40 2716 0921.

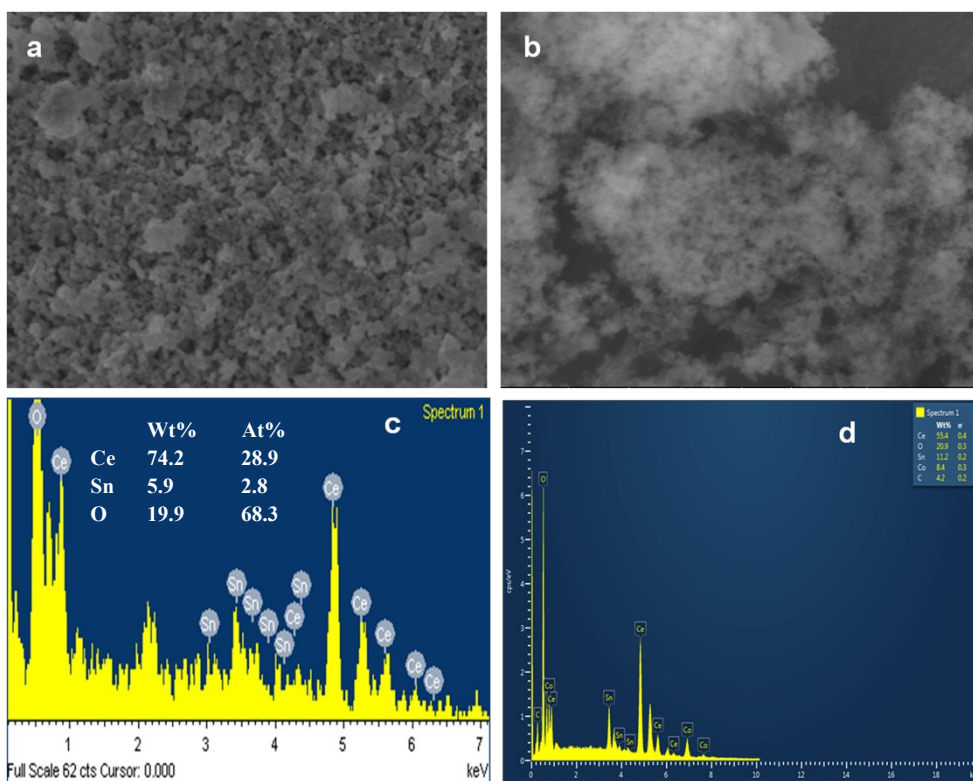

**Figure S1:** FESEM (a, b) and EDX (c, d) images of tin-doped-ceria (CS) and tin-doped-ceria supported  $\text{CoO}_x$  (Co/CS) calcined at 773 K.

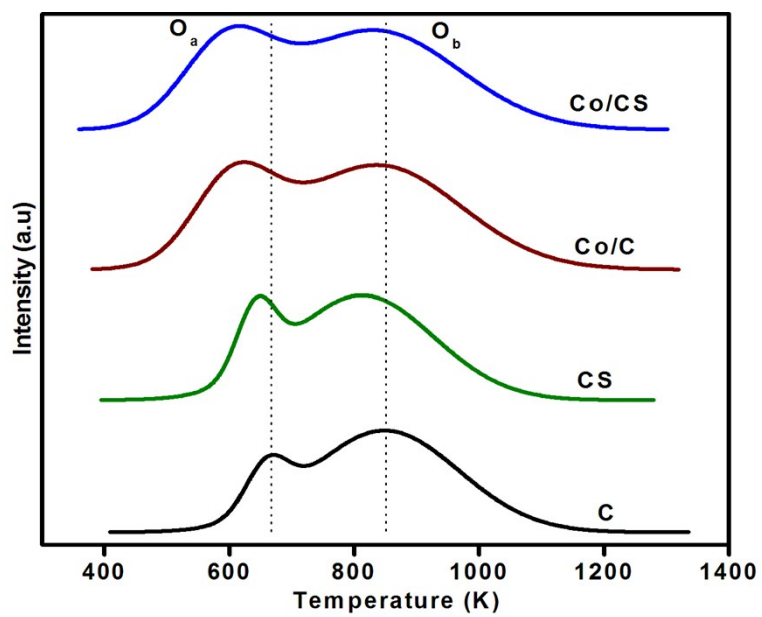

**Figure S2:** O<sub>2</sub>-TPD profiles of pure ceria (C), tin-doped-ceria (CS), ceria supported CoO<sub>x</sub> (Co/C), and tin-doped-ceria supported CoO<sub>x</sub> (Co/CS) calcined at 773 K.

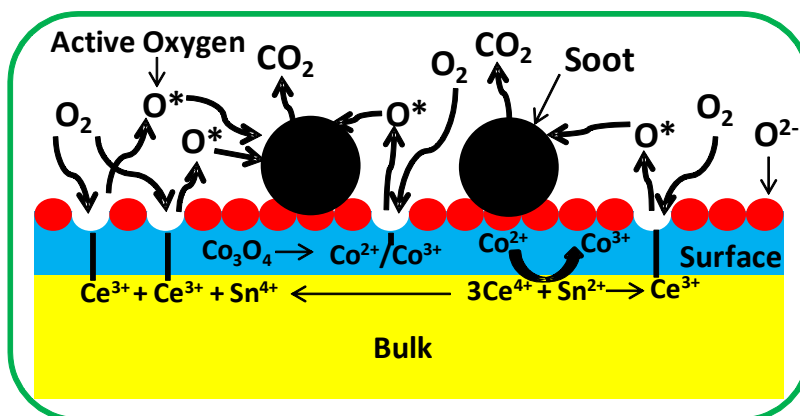

**Figure S3:** Proposed reaction mechanism of soot oxidation over the tin-doped-ceria supported  $\text{CoO}_x$  (Co/CS) calcined at 773 K.

The proposed soot oxidation mechanism over the Co/CS catalysts is described in Figure S3. Initially, the oxygen vacancies are created by the synergistic interaction among the  $\text{Co}^{2+}/\text{Co}^{3+}$ ,  $\text{Sn}^{2+}/\text{Sn}^{4+}$ , and  $\text{Ce}^{3+}/\text{Ce}^{4+}$  redox couples at the  $\text{Co}_3\text{O}_4/\text{CeO}_2\text{-SnO}_2$  interface. The  $\text{Co}_3\text{O}_4$  to  $\text{Co}^{2+}/\text{Co}^{3+}$  transformation also generates some oxygen vacancies on the surface of the sample. The active oxygen species (usually  $\text{O}_2^-$  species) could be formed by the adsorption of gaseous  $\text{O}_2$  on the oxygen vacancies. Subsequently, these active oxygen species spills over the catalyst to the adjacent soot particles and oxidizes the soot. Therefore, the formation of more surface oxygen vacancies could make the adsorption of gas-phase oxygen easily and create more active oxygen which could improve the soot oxidation performance.
